# Supplementary material
Source: PubMed Central journal article supplement (PMC9135677)
Supplement: mmc1.pdf [file mmc1.pdf]

**Cell, Volume 185**

**Supplemental information**

**Humoral and cellular immune memory**

**to four COVID-19 vaccines**

**Zeli Zhang, Jose Mateus, Camila H. Coelho, Jennifer M. Dan, Carolyn Rydyznski Moderbacher, Rosa Isela Gálvez, Fernanda H. Cortes, Alba Grifoni, Alison Tarke, James Chang, E. Alexandar Escarrega, Christina Kim, Benjamin Goodwin, Nathaniel I. Bloom, April Frazier, Daniela Weiskopf, Alessandro Sette, and Shane Crotty**

## Supplemental Tables

**Table S1. Reagents used for AIM assays. Related to STAR Methods.**

| <b>Reagent</b>     | <b>Clone (Source)</b>   | <b>Catalog. No.</b> | <b>Dilution</b> |
|--------------------|-------------------------|---------------------|-----------------|
| Live/Dead Blue     | (ThermoFisher)          | L23105              | 1:1000          |
| CCR6-BUV496        | 11A9 (BD Biosciences)   | 612948              | 1:200           |
| CXCR5-BV421        | J252D4 (Biolegend)      | 356920              | 1:200           |
| CXCR3-BV605        | G025H7 (Biolegend)      | 353728              | 1:200           |
| CCR7-BV711         | G043H7 (Biolegend)      | 353228              | 1:200           |
| CD3-BUV395         | UCHT1 (BD Biosciences)  | 563546              | 1:1000          |
| CD137-BUV737       | 4B4-1 (BD Biosciences)  | 741861              | 1:100           |
| CD8-BUV805         | SK1 (BD Biosciences)    | 612889              | 1:1000          |
| CD16-BV510         | 3G8 (Biolegend)         | 302048              | 1:1000          |
| CD14-BV510         | 63D3 (Biolegend)        | 367124              | 1:1000          |
| CD20-BV510         | 2H7 (Biolegend)         | 302340              | 1:1000          |
| CD45RA-BV570       | HI100 (Biolegend)       | 304132              | 1:1000          |
| CD38-BV650         | HB-7 (Biolegend)        | 356620              | 1:200           |
| PD-1-BV785         | EH12.2H7 (Biolegend)    | 329930              | 1:200           |
| CD69-FITC          | FN50 (Biolegend)        | 310904              | 1:200           |
| CD4-cFluor b548    | SK3 (Cytex Biosciences) | R7-20043            | 1:500           |
| CD95-BB700         | DX2 (BD Biosciences)    | 566542              | 1:500           |
| CD40L-PE-Dazzle594 | 24-31 (Biolegend)       | 310840              | 1:200           |
| OX40-APC           | Ber-Act35 (Biolegend)   | 350008              | 1:100           |
| HLA-DR-APC-R700    | G46-6 (BD Biosciences)  | 565127              | 1:500           |

**Table S2. Reagents used for ICS assays. Related to STAR Methods.**

| <b>Reagent</b>          | <b>Clone (Source)</b>      | <b>Catalog. No.</b> | <b>Dilution</b> |
|-------------------------|----------------------------|---------------------|-----------------|
| Live/Dead Blue          | (ThermoFisher)             | L23105              | 1:1000          |
| CD3-BUV395              | UCHT1 (BD Biosciences)     | 563546              | 1:100           |
| CD8-BUV805              | SK1 (BD Biosciences)       | 612889              | 1:100           |
| CD16-BV510              | 3G8 (Biolegend)            | 302048              | 1:200           |
| CD14-BV510              | 63D3 (Biolegend)           | 367124              | 1:200           |
| CD20-BV510              | 2H7 (Biolegend)            | 302340              | 1:200           |
| CD45RA-BV570            | HI100 (Biolegend)          | 304132              | 1:50            |
| CD4-cFluor b548         | SK3 (Cytex Biosciences)    | R7-20043            | 1:25            |
| CD69-BV605              | FN50 (BD Biosciences)      | 562989              | 1:100           |
| CCR7-PE-Cy7             | G043H7 (Biolegend)         | 353226              | 1:100           |
| IL-4-BUV737             | MP4-25D2 (BD Biosciences)  | 612835              | 1:200           |
| IL-17-BV785             | BL168 (Biolegend)          | 512338              | 1:100           |
| IFN $\gamma$ -FITC      | 4S.B3 (ThermoFisher)       | 11-7319-82          | 1:500           |
| IL-2-BB700              | MQ1-17H12 (BD Biosciences) | 566405              | 1:200           |
| IL-10 -PE-Dazzle594     | JES3-19F1 (Biolegend)      | 506812              | 1:100           |
| TNF $\alpha$ -eFluor450 | Mab11 (ThermoFisher)       | 48-7349-42          | 1:200           |
| Granzyme B-AF647        | GB11 (BD Biosciences)      | 560212              | 1:50            |
| CD40L-PerCP-ef710       | 24-31 (ThermoFisher)       | 46-1548-42          | 1:50            |

**Table S3. Reagents used for B cell assays. Related to STAR Methods.**

| <b>Reagent</b>               | <b>Clone (Source)</b>       | <b>Catalog. No.</b> | <b>Dilution</b> |
|------------------------------|-----------------------------|---------------------|-----------------|
| Live/Dead Blue               | (Thermo Fisher)             | L34962              | 1:200           |
| CD19-BUV563                  | SJ25C1 (BD Biosciences)     | 612916              | 1:200           |
| CD95-BUV737                  | DX2 (BD Biosciences)        | 612790              | 1:200           |
| CD183-BUV805                 | 1C6/CXCR3 (BD Biosciences)  | 742048              | 1:50            |
| IgD-Pacific Blue             | IA6-2 (Biolegend)           | 348224              | 1:50            |
| CD20-Brilliant Violet 510    | 2H7 (Biolegend)             | 302340              | 1:100           |
| IgM-Brilliant Violet 570     | MHM-88 (Biolegend)          | 314517              | 1:200           |
| T-bet Brilliant Violet 605   | 4B10 (Biolegend)            | 644817              | 1:50            |
| CD27-BB515                   | M-T271 (BD Biosciences)     | 564642              | 1:200           |
| IgA-VioBright-FITC           | IS11-8E10 (Miltenyi Biotec) | 130-113-480         | 1:400           |
| CD3-PerCP                    | SK7 (Biolegend)             | 344814              | 1:100           |
| CD14-PerCP                   | 63D3 (Biolegend)            | 367152              | 1:200           |
| CD16-PerCP                   | 3G8 (Biolegend)             | 302030              | 1:200           |
| CD56-PerCP                   | HCD56 (Biolegend)           | 318342              | 1:200           |
| IgG-PerCP-Cyanine5.5         | M1310G05 (Biolegend)        | 410710              | 1:100           |
| CD71-PE-Dazzle 594           | CY1G4 (Biolegend)           | 334120              | 1:200           |
| CD11c-PE-Cy5                 | 3.9 (Biolegend)             | 301610              | 1:200           |
| CD21-Alexa Fluor 700         | Bu32 (Biolegend)            | 354918              | 1:50            |
| CD38-APC-Fire 810            | HIT2 (Biolegend)            | 303550              | 1:200           |
| Alexa Fluor 647 Streptavidin | (Thermo Fisher)             | S21374              | 1:59            |
| BV421 Streptavidin           | (Biolegend)                 | 405225              | 1:59            |
| BV711 Streptavidin           | (Biolegend)                 | 405241              | 1:400           |
| PE-Cy7 Streptavidin          | (Biolegend)                 | 405206              | 1:400           |
| PE-Cy5.5 Streptavidin        | (Thermo Fisher)             | SA1018              | 1:500           |
